# Supplementary material for: Irreversible transformation of chiral to achiral polymorph of K[Co(HCOO)3]: synthesis, structures, and magnetic properties
Source: Royal Society of Chemistry journal article supplement (doi:10.1039/c0dt01701a), 2011-01-01
Supplement: c0dt01701a.pdf [file c0dt01701a.pdf]

Electronic Supporting Information for “**Irreversible transformation of chiral to achiral polymorph of K[Co(HCOO)<sub>3</sub>]: synthesis, structures, and magnetic properties**” by Zhiming Duan *et al.*

Table S1. IR absorption bands (cm<sup>-1</sup>) and their assignments for **1** and **2**.

| Assignment                      | <b>1</b>  | <b>2</b>         |
|---------------------------------|-----------|------------------|
| 2 $\nu_4$ or $\nu_2 + \nu_4$    | 2985 (vw) | 3020 (vw)        |
|                                 | 2933 (vw) | 2966 (vw, sh)    |
|                                 |           | 2940 (vw)        |
| $\nu_1$ , C–H stretch           | 2893 (w)  | 2852 (w)         |
| 2 $\nu_5$                       | 2750 (vw) | 2759 (vw)        |
| $\nu_2 + \nu_5$                 |           | 2741 (vw)        |
| 2 $\nu_2$                       |           | 2726 (vw)        |
| $\nu_4$ , OCO stretch, asym     | 1581 (vs) | 1597 (vs)        |
| $\nu_5$ , OCO deformation, asym | 1385 (s)  | 1389 (s)         |
| $\nu_2$ , OCO stretch, sym      | 1373 (s)  | 1365 (s)         |
| $\nu_3$ , OCO-deformation, sym  | 802 (m)   | 797 (m), 777 (m) |

s, strong; m, medium; w, weak; vw, very weak; sh, shoulder; vs, very strong.

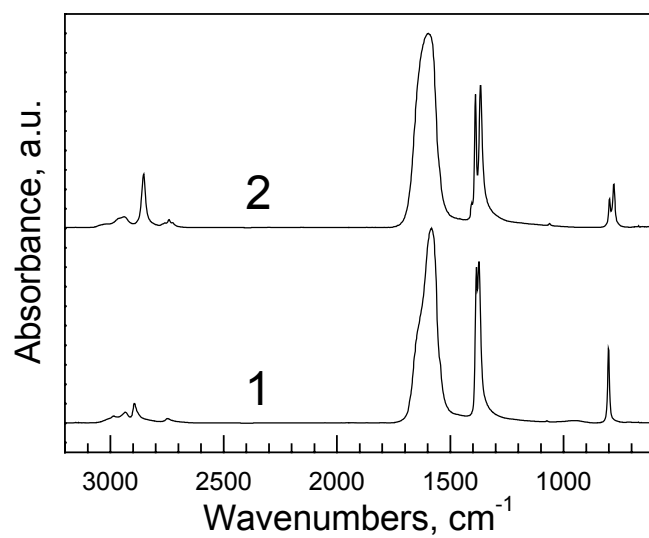

Fig. S1. Overlay of IR spectra of **1** and **2**.

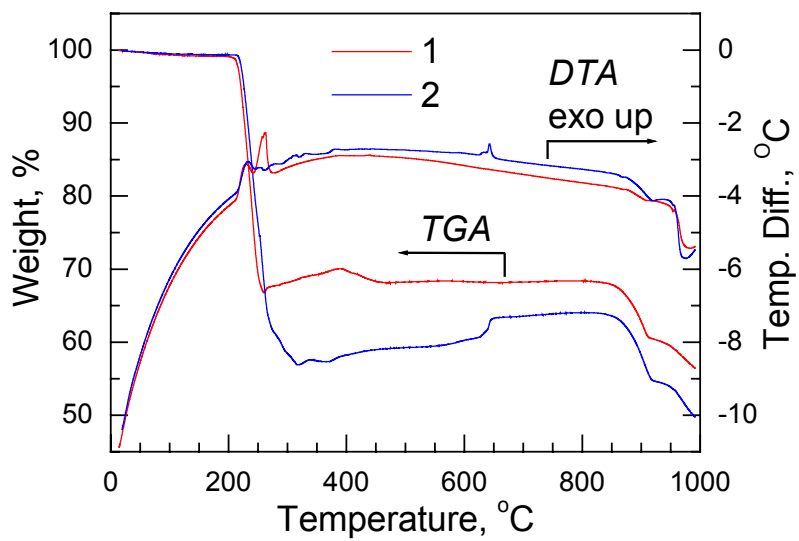

Fig. S2. TGA-DTA traces for 1 and 2.

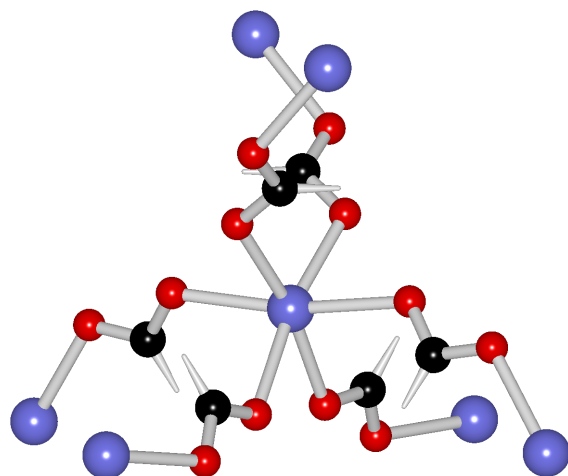

(a)

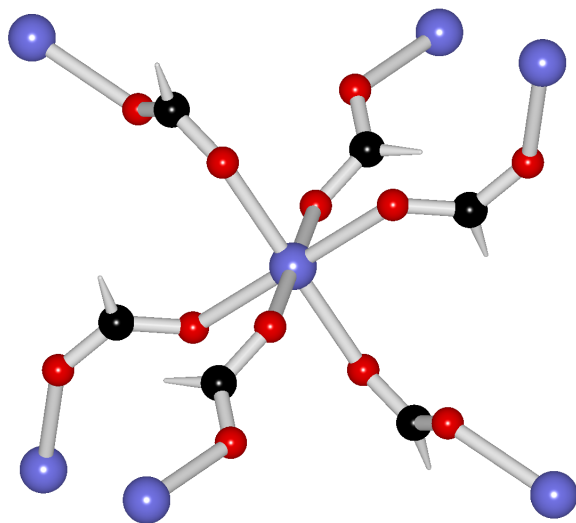

(b)

Fig. S3. The local coordination environments of the  $\text{Co}^{2+}$  ion with its six neighboring  $\text{Co}^{2+}$  ions through bridging  $\text{HCOO}^-$  in **1** (a) and **2** (b).

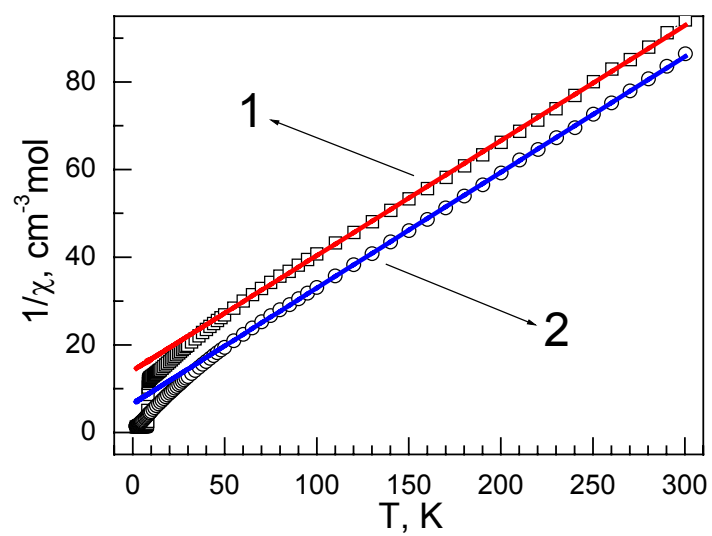

Fig. S4. The  $1/\chi$  vs  $T$  plots for **1** and **2**, with the Curie-Weiss fittings in red and blue lines.

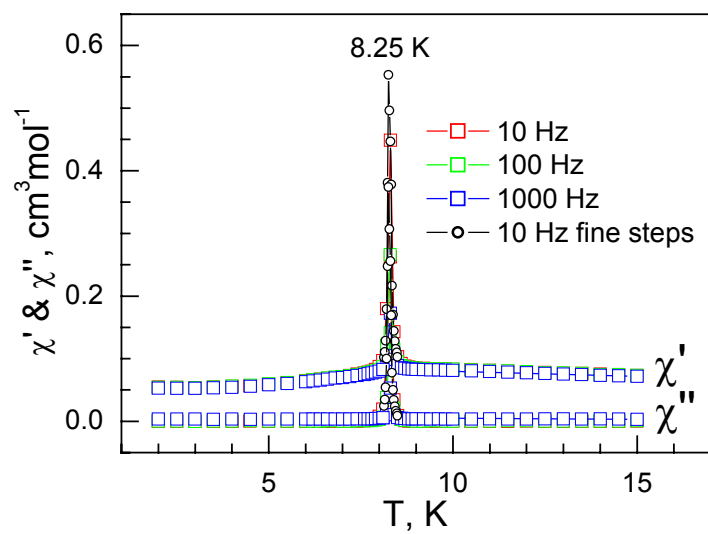

Fig. S5. Temperature dependence of ac (10, 100, 1000 Hz) susceptibilities of **1** under zero dc field. The fine-step measurement is highlighted in black circles.
